# Supplementary material for: Coupled W–Co2P hybrid nanosheets as a robust bifunctional electrocatalyst for hydrazine-assisted hydrogen production
Source: Royal Society of Chemistry journal article supplement (doi:10.1039/d3cc00931a), 2023-01-01
Supplement: d3cc00931a1.pdf [file d3cc00931a1.pdf]

## Supporting Information

### Coupled W-Co<sub>2</sub>P Hybrid Nanosheets as Robust Bifunctional Electrocatalyst for Hydrazine-Assisted Hydrogen Production

*Kaixun Li<sup>a</sup>, Xujiang Cen<sup>b</sup>, JinFeng He<sup>a</sup> and Yun Tong<sup>a\*</sup>*

<sup>a</sup> School of Chemistry and Chemical Engineering, Key Laboratory of Surface & Interface Science of Polymer Materials of Zhejiang Province, Zhejiang Sci-Tech University, Hangzhou 310018, China

<sup>b</sup> Research & Development Park, NingBo ZhongTian Engineering Co.,Ltd, Lane 999, Ningbo, China.

Correspondence and requests for materials should be addressed to Y. Tong (E-mail: tongyun@mail.ustc.edu.cn)

## Table of contents

|                                                                                                                                                                                                                               |    |
|-------------------------------------------------------------------------------------------------------------------------------------------------------------------------------------------------------------------------------|----|
| <b>Figure S1</b> (a-b) SEM images of Co <sub>2</sub> P/NF sample.....                                                                                                                                                         | 6  |
| <b>Figure S2</b> SEM images of W/NF sample. ....                                                                                                                                                                              | 7  |
| <b>Figure S3</b> The XRD pattern of Co <sub>2</sub> P/NF sample. ....                                                                                                                                                         | 8  |
| <b>Figure S4</b> The XRD pattern of W/NF sample. ....                                                                                                                                                                         | 8  |
| <b>Figure S5</b> The XRD pattern of W@Co <sub>2</sub> P/NF sample. ....                                                                                                                                                       | 9  |
| <b>Figure S6</b> The XRD patterns of different W@Co <sub>2</sub> P/NF samples by using different W sources. ....                                                                                                              | 9  |
| <b>Figure S7</b> The XPS survey spectra of W@Co <sub>2</sub> P/NF sample. ....                                                                                                                                                | 10 |
| <b>Figure S8</b> The XPS survey spectra of Co <sub>2</sub> P/NF sample.....                                                                                                                                                   | 10 |
| <b>Figure S9</b> The XPS survey spectra of W/NF sample. ....                                                                                                                                                                  | 11 |
| <b>Figure S10</b> The high-resolution XPS spectra of (a) Co 2p, (b) P 2p and (c) W 4f for Co <sub>2</sub> P/NF, W/NF and W@Co <sub>2</sub> P/NF samples. ....                                                                 | 11 |
| <b>Figure S11</b> The cyclic voltammetry curves of (a) NF, (b) W/NF, (c) Co <sub>2</sub> P/NF and (d) W@Co <sub>2</sub> P/NF electrodes in 1.0 M KOH recorded at different scan rates from 20 to 100 mV s <sup>-1</sup> . ... | 12 |
| <b>Figure S12</b> (a) Calculated ECSA values and (b) ECSA-normalized LSV curves of NF, W/NF, Co <sub>2</sub> P/NF and W@Co <sub>2</sub> P/NF.....                                                                             | 13 |
| <b>Figure S13</b> HER polarization curves before and after 3000 cycles of W@Co <sub>2</sub> P/NF electrode.....                                                                                                               | 13 |
| <b>Figure S14</b> Chronoamperometric response of W@Co <sub>2</sub> P/NF for HER in 1M KOH.....                                                                                                                                | 14 |
| <b>Figure S15</b> LSV curves in different concentrations of N <sub>2</sub> H <sub>4</sub> . ....                                                                                                                              | 14 |
| <b>Figure S16</b> Nyquist plots of NF, Co <sub>2</sub> P/NF, W/NF and W@Co <sub>2</sub> P/NF samples. ....                                                                                                                    | 15 |
| <b>Figure S17</b> Polarization curves before and after 3000 cycles of W@Co <sub>2</sub> P/NF for UOR in 1 M KOH and 0.4 M N <sub>2</sub> H <sub>4</sub> . ....                                                                | 15 |
| <b>Figure S18</b> The polarization curves of NF for (a) HER and (b) HzOR in the electrolytes with different W sources. ....                                                                                                   | 16 |

|                                                                                                                                                             |    |
|-------------------------------------------------------------------------------------------------------------------------------------------------------------|----|
| <b>Figure S19</b> Chronoamperometric response of W@Co <sub>2</sub> P/NF for UOR in 1 M KOH and 0.4 M N <sub>2</sub> H <sub>4</sub> . .....                  | 16 |
| <b>Figure S20</b> LSV curves of W@Co <sub>2</sub> P/NF-based electrolyzer in 1 M KOH electrolyte with and without 0.4 M N <sub>2</sub> H <sub>4</sub> ..... | 17 |
| <b>Figure S21</b> Chronoamperometric response of W@Co <sub>2</sub> P/NF-based electrolyzer.....                                                             | 17 |
| <b>Figure S22</b> The post-XRD patterns of W@Co <sub>2</sub> P/NF sample after a long time tests of HER and HzOR.....                                       | 18 |
| <b>Figure S23</b> The post-XPS spectra of W@Co <sub>2</sub> P/NF sample after a long time test of HzOR, (a) Co 2p, (b) P 2p and (c) W 4f.....               | 19 |
| <b>Figure S24</b> The post-SEM images of W@Co <sub>2</sub> P/NF sample after a long time test of HzOR. ....                                                 | 20 |
| <b>Table S1</b> Performance comparison of W@Co <sub>2</sub> P/NF with various kinds of reported electrocatalysts for HER. ....                              | 21 |
| <b>Table S2</b> Performance comparison of W@Co <sub>2</sub> P/NF with other well-developed catalytic materials for HzOR. ....                               | 22 |
| <b>Table S3</b> Performance comparison of W@Co <sub>2</sub> P/NF-based electrolyzers with other reported bifunctional electrodes. ....                      | 23 |
| <b>References</b> .....                                                                                                                                     | 24 |

## Experimental Section

*Materials:* Hydrochloric acid (HCl, AR) is purchased from Country shuanglin chemical, Potassium hydroxide (KOH, AR), Sodium hypophosphite monohydrate (NaHPO<sub>2</sub>, AR), Absolute ethanol (C<sub>2</sub>H<sub>5</sub>OH, 99.7%), Cobalt nitrate (II) hexahydrate (Co(NO<sub>3</sub>)<sub>2</sub>·6H<sub>2</sub>O, 98%) and Ammonium metatungstate ((NH<sub>4</sub>)<sub>6</sub>H<sub>2</sub>W<sub>12</sub>O<sub>40</sub>·xH<sub>2</sub>O, 98%) are purchased from Aladdin.

*Synthesis of W@Co<sub>2</sub>P/NF, Co<sub>2</sub>P/NF and W/NF electrodes:* In a typical synthesis process, NF (2 × 4 cm) is treated by ultrasonic cleaning in acetone, water and 3.0 M hydrochloric acid for 10 min, respectively. Then 40 ml of aqueous solution containing (Co(NO<sub>3</sub>)<sub>2</sub>·6H<sub>2</sub>O, 0.1 M), Ammonium metatungstate ((NH<sub>4</sub>)<sub>6</sub>H<sub>2</sub>W<sub>12</sub>O<sub>40</sub>·xH<sub>2</sub>O, 1.3 mM) and (NaH<sub>2</sub>PO<sub>2</sub>·H<sub>2</sub>O, 1 M) is prepared, and then 10 mL of 1 M HCl or 0.5 M H<sub>2</sub>SO<sub>4</sub> is added to above solution. The NF (2 cm×1 cm) is used working electrode and immersed into 50 mL of the prepared aqueous solution. Platinum foil and saturated calomel electrode are used as counter electrode and reference electrode, respectively. The electrodeposition process is carried out at a constant voltage of -2 V for 10 minutes, then the electrodes are washed by ethanol/water mixture for three times and dried in vacuum oven. The simple W/NF and Co<sub>2</sub>P/NF electrodes are prepared by a similar electrodeposition method by only using (NH<sub>4</sub>)<sub>6</sub>H<sub>2</sub>W<sub>12</sub>O<sub>40</sub>·xH<sub>2</sub>O and Co(NO<sub>3</sub>)<sub>2</sub>·6H<sub>2</sub>O as solutions, respectively. In addition, the other W sources (Na<sub>2</sub>WO<sub>4</sub>, WCl<sub>3</sub>, (NH<sub>4</sub>)<sub>6</sub>W<sub>7</sub>O<sub>24</sub>) are also used to prepare the W@Co<sub>2</sub>P/NF electrodes.

*Material Characterizations:* The powder X-ray diffraction (PXRD) is conducted on a DX-2700 diffractometer (Dandong Haoyuan Instrument Co. Ltd. China) to analyze the phase compositions and crystal structure of catalysts. The surface morphology and composition are studied by applying a scanning electron microscope (SEM, Hitachi SU8100) and high-resolution transmission electron microscopy (HRTEM). The X-ray photoelectron spectroscopy (XPS) is carried out on a PHI5300 instrument with monochromatic Mg K $\alpha$  as the source of radiation to confirm the chemical states of elements in the samples.

*Electrochemical measurements:* Electrochemical measurements are performed by an electrochemical workstation (CHI660E, Chenhua Instrument, Shanghai, China) using a three-electrode configuration. The self-supported materials are used as working electrodes, while the counting electrode is a graphite rod electrode and the reference electrode is a saturated calomel electrode. Linear sweep voltammetry (LSV, scan rate of 5 mV s<sup>-1</sup>) is collected to analyze the HER and OER performance in a 1.0 M KOH electrolyte, while the HzOR performance is recorded in 1.0 M KOH with 0.4 M N<sub>2</sub>H<sub>4</sub>

electrolyte. All the results are converted into the potential of the reversible hydrogen electrode according to the following equation:  $E_{(vs.RHE)} = E_{(vs.Hg/HgCl_2)} + E^{\circ}_{(Hg/HgCl_2)} (0.241 \text{ V}) + 0.059 \cdot pH$ . The electrochemical impedance spectroscopy (EIS) measurements is measured under an AC voltage model at a fixed overpotential in a frequency range of ( $10^{-2}$ - $10^5$  Hz). The electrochemical double-layer capacitance ( $C_{dl}$ ) is recorded by CV curves with the scanning rate of 20, 40, 60, 80, and 100  $mV s^{-1}$ . All the data are presented after IR-correction.

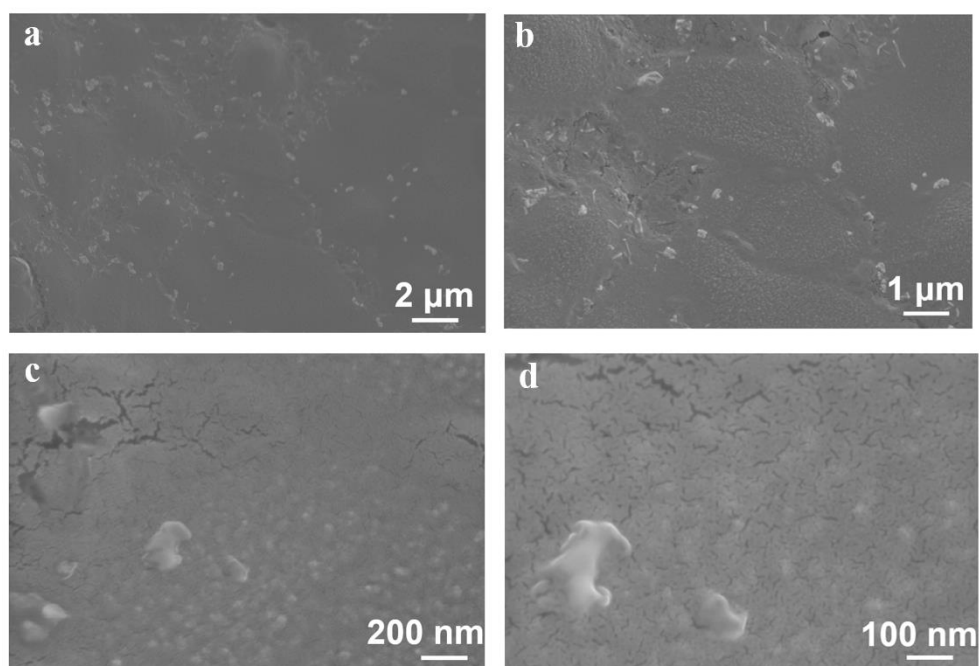

**Figure S1** (a-b) SEM images of Co<sub>2</sub>P/NF sample.

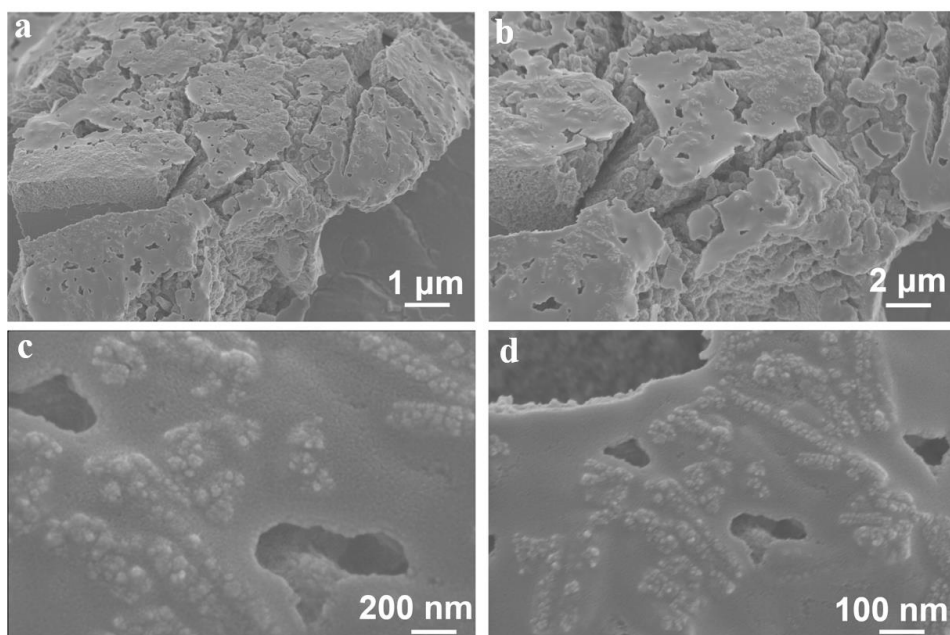

**Figure S2** SEM images of W/NF sample.

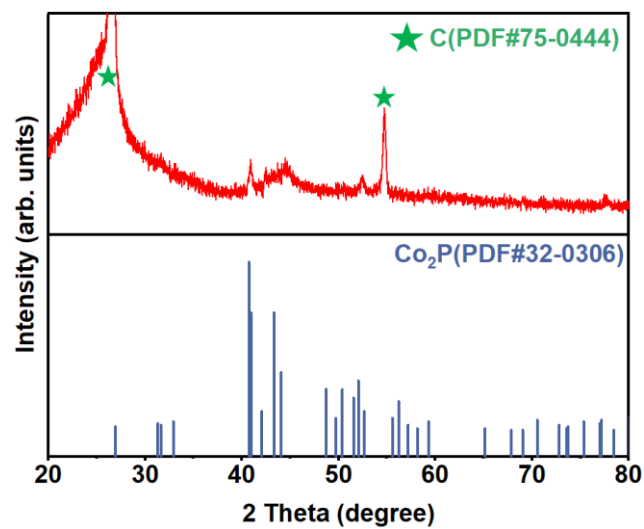

**Figure S3** The XRD pattern of  $\text{Co}_2\text{P}/\text{NF}$  sample.

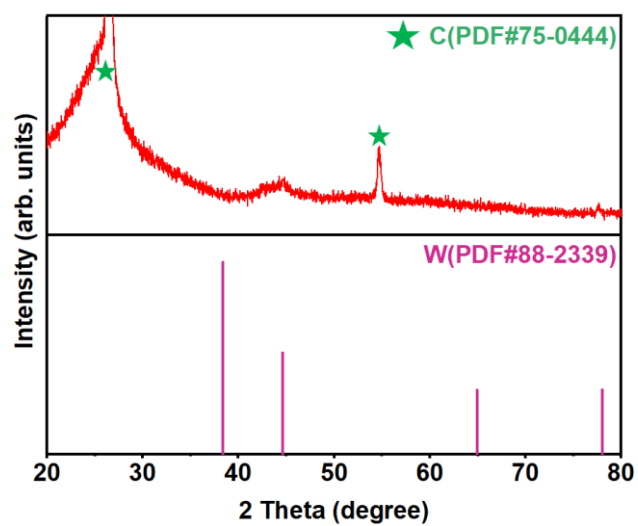

**Figure S4** The XRD pattern of  $\text{W}/\text{NF}$  sample.



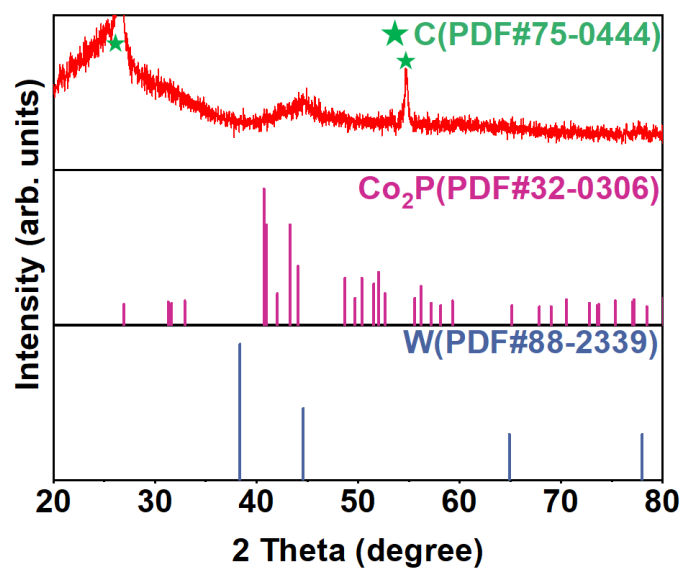

**Figure S5** The XRD pattern of W@Co<sub>2</sub>P/NF sample.

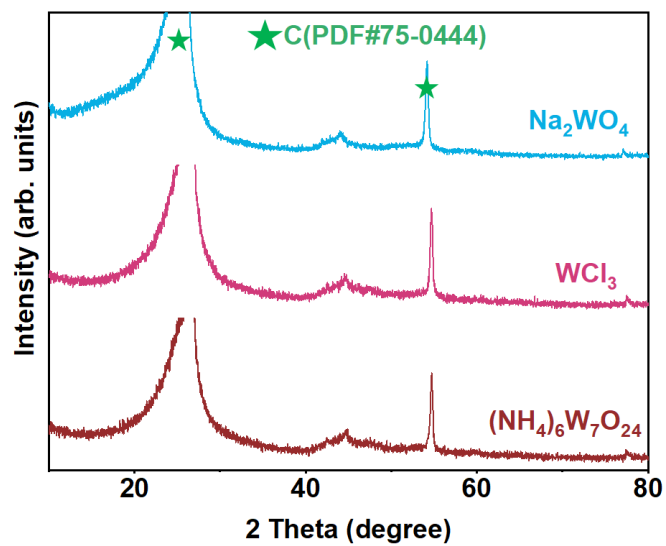

**Figure S6** The XRD patterns of different W@Co<sub>2</sub>P/NF samples by using different W sources.

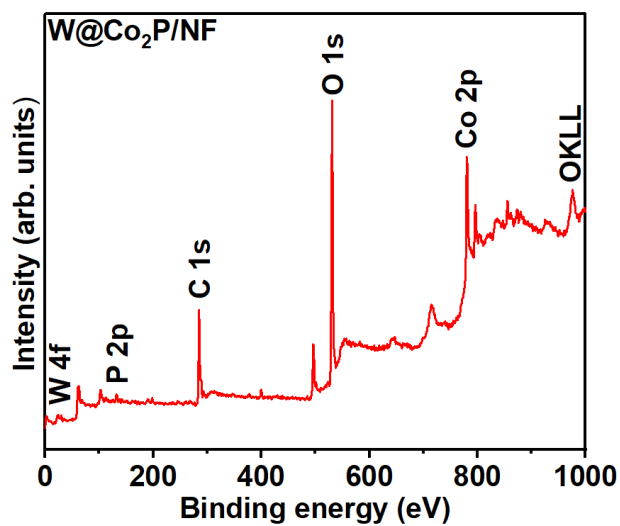

**Figure S7** The XPS survey spectra of W@Co<sub>2</sub>P/NF sample.

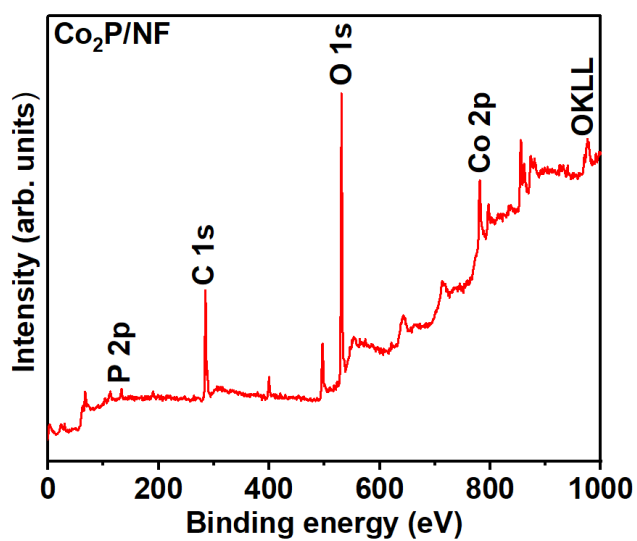

**Figure S8** The XPS survey spectra of Co<sub>2</sub>P/NF sample.

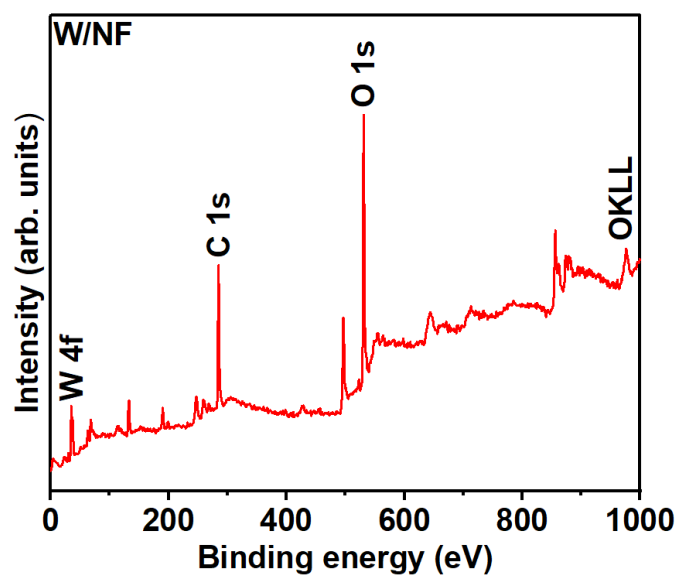

**Figure S9** The XPS survey spectra of W/NF sample.

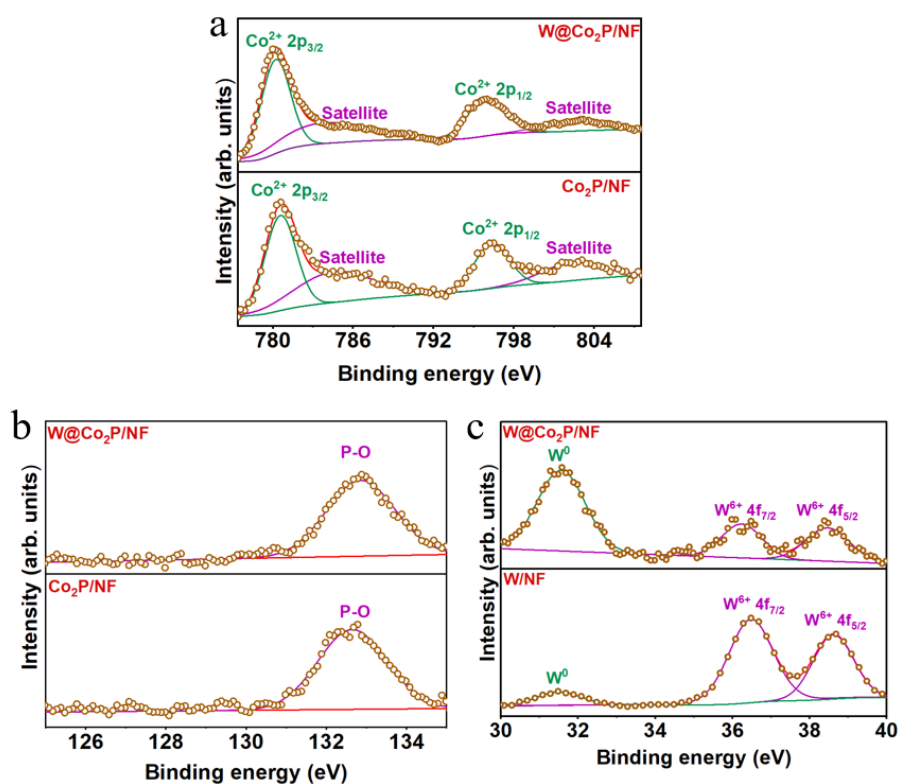

**Figure S10** The high-resolution XPS spectra of (a) Co 2p, (b) P 2p and (c) W 4f for Co<sub>2</sub>P/NF, W/NF and W@Co<sub>2</sub>P/NF samples.

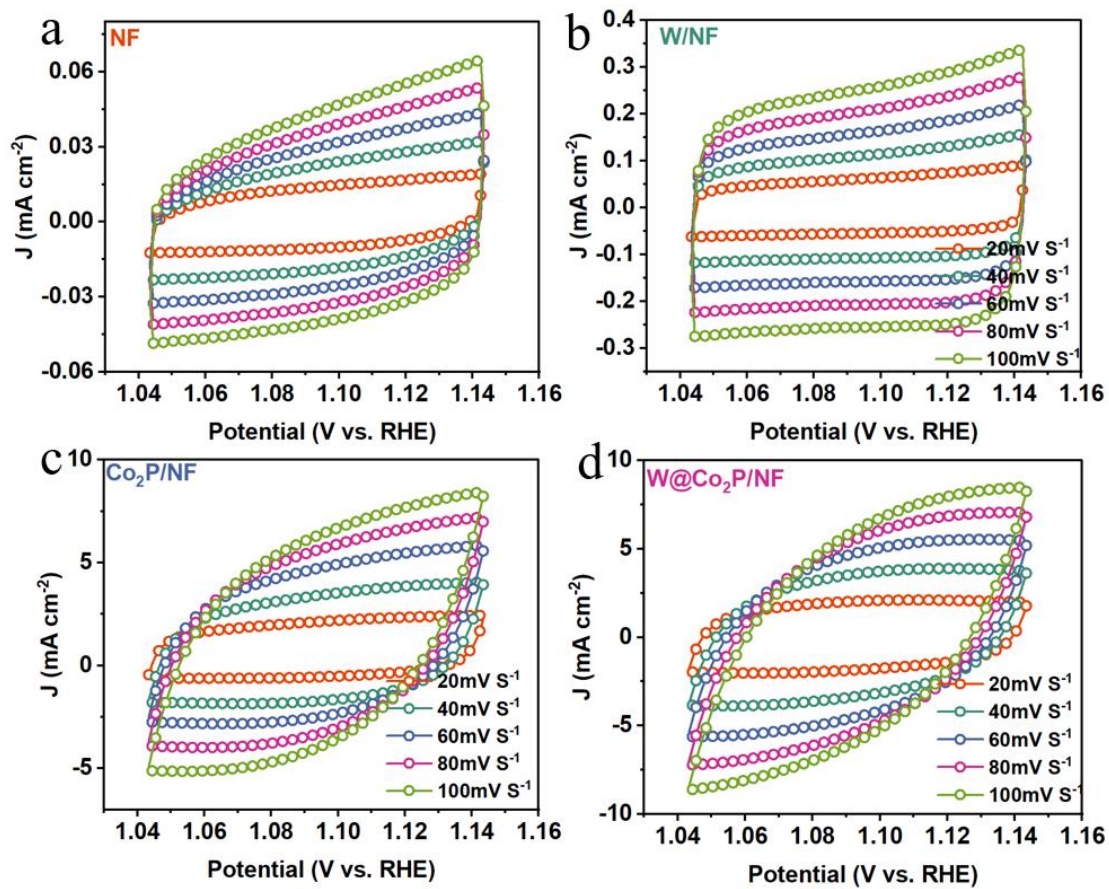

**Figure S11** The cyclic voltammetry curves of (a) NF, (b) W/NF, (c) Co<sub>2</sub>P/NF and (d) W@Co<sub>2</sub>P/NF electrodes in 1.0 M KOH recorded at different scan rates from 20 to 100 mV s<sup>-1</sup>.

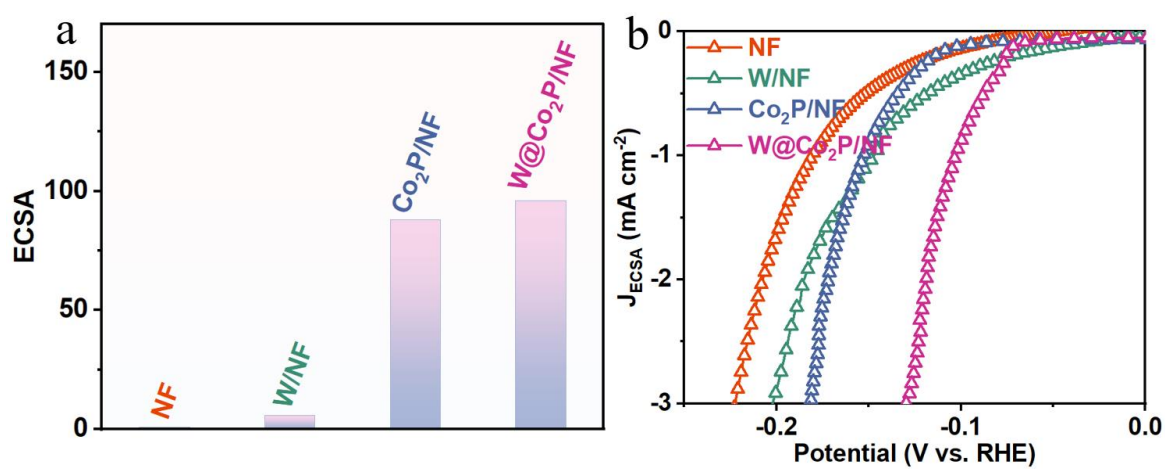

**Figure S12** (a) Calculated ECSA values and (b) ECSA-normalized LSV curves of NF, W/NF, Co<sub>2</sub>P/NF and W@Co<sub>2</sub>P/NF.

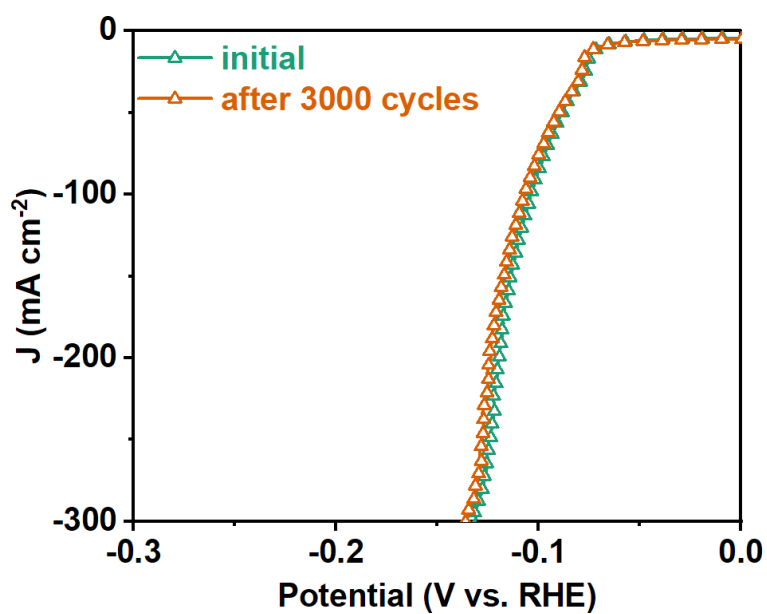

**Figure S13** HER polarization curves before and after 3000 cycles of W@Co<sub>2</sub>P/NF electrode.

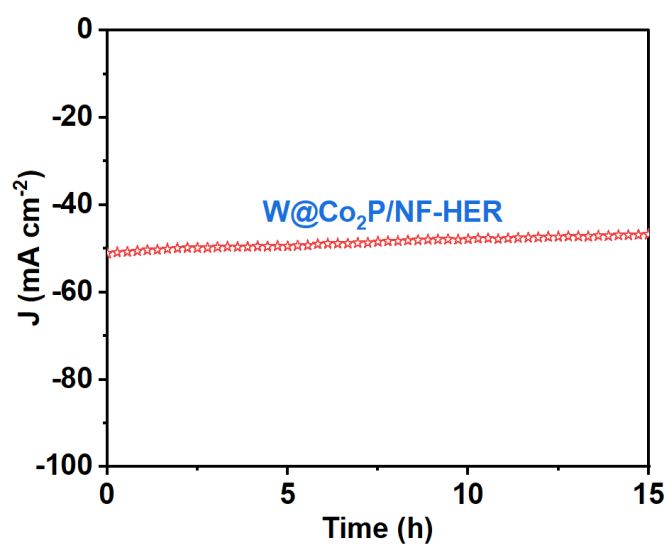

**Figure S14** Chronoamperometric response of W@Co<sub>2</sub>P/NF for HER in 1M KOH.

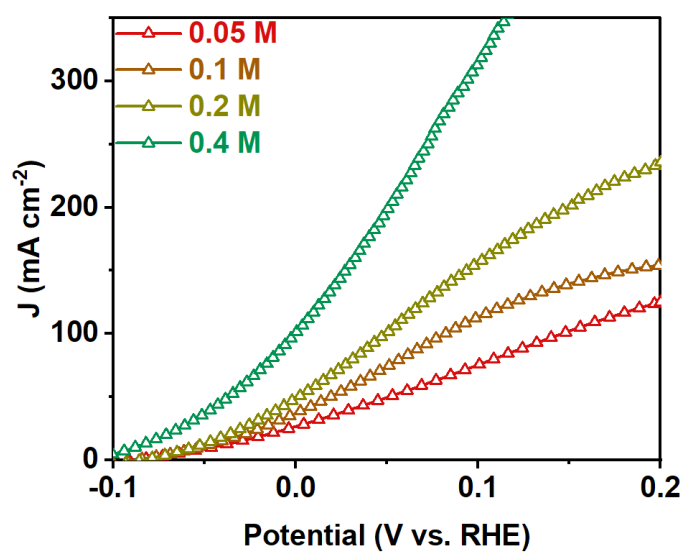

**Figure S15** LSV curves in different concentrations of N<sub>2</sub>H<sub>4</sub>.

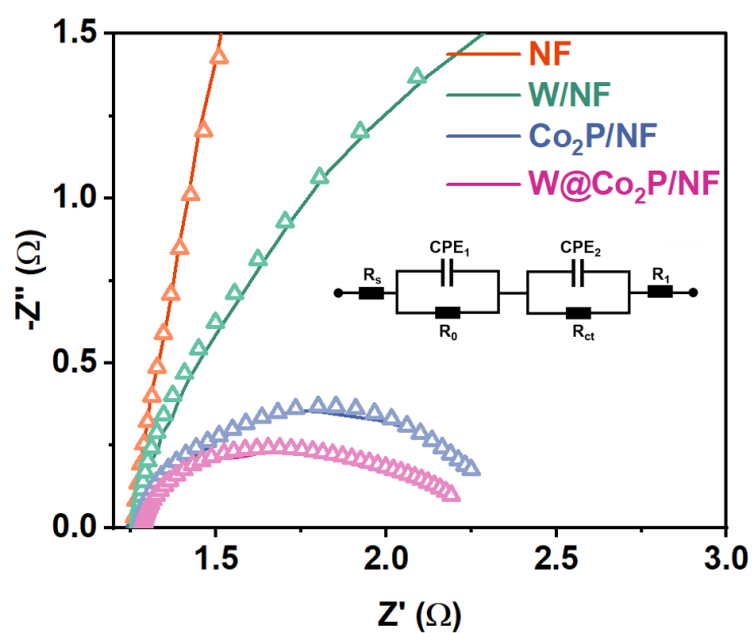

**Figure S16** Nyquist plots of NF, Co<sub>2</sub>P/NF, W/NF and W@Co<sub>2</sub>P/NF samples.

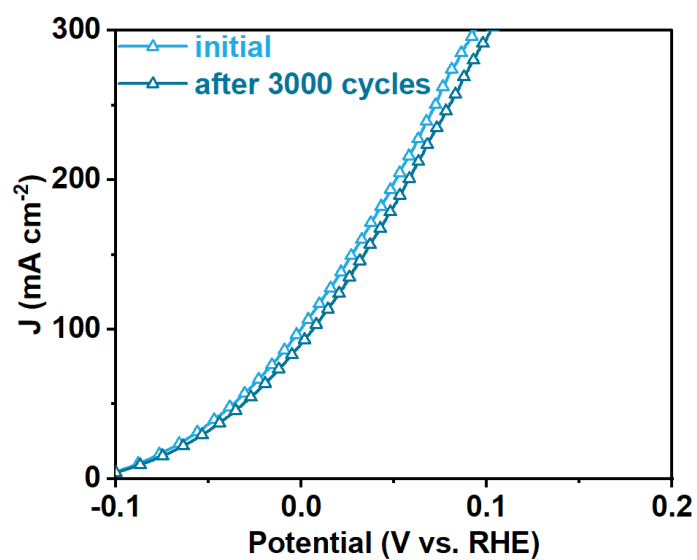

**Figure S17** Polarization curves before and after 3000 cycles of W@Co<sub>2</sub>P/NF for UOR in 1 M KOH and 0.4 M N<sub>2</sub>H<sub>4</sub>.

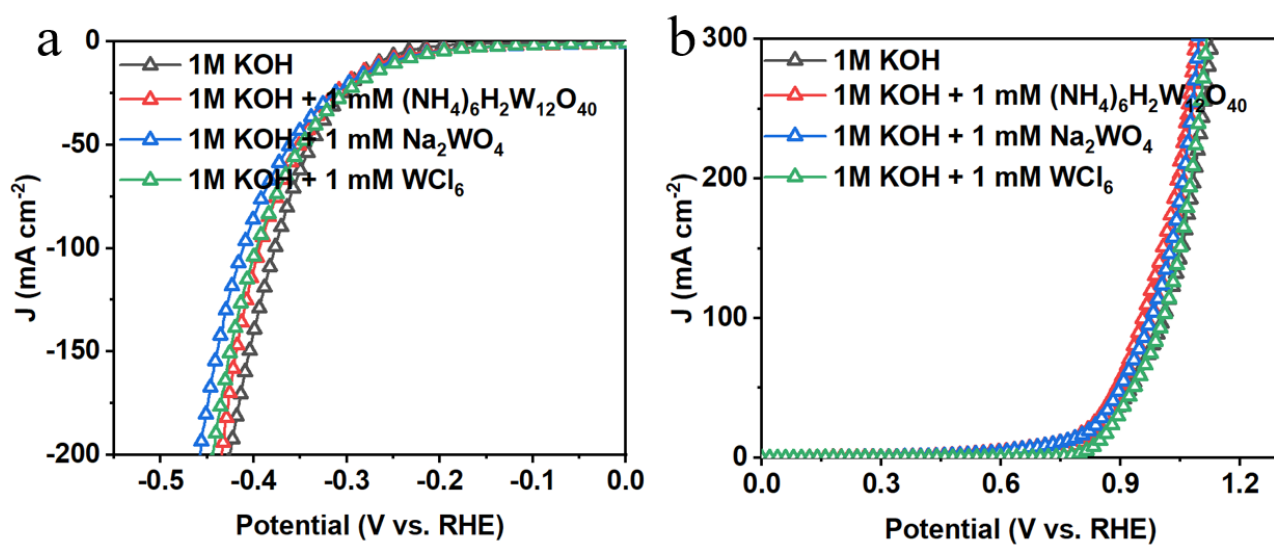

**Figure S18** The polarization curves of NF for (a) HER and (b) HzOR in the electrolytes with different W sources.

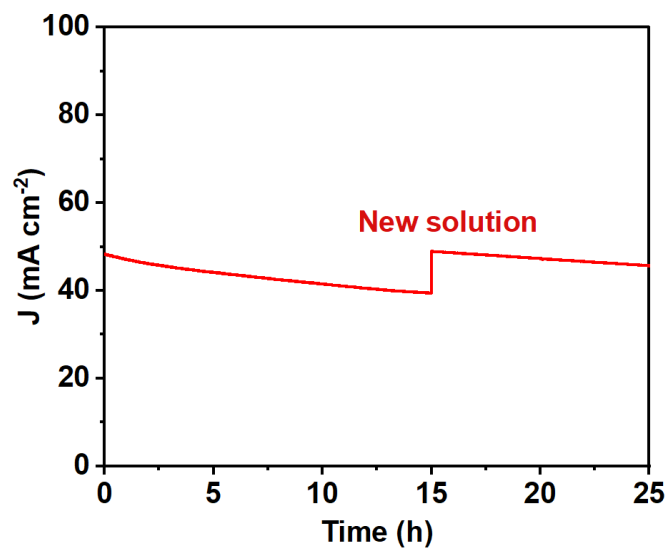

**Figure S19** Chronoamperometric response of W@Co<sub>2</sub>P/NF for UOR in 1 M KOH and 0.4 M N<sub>2</sub>H<sub>4</sub>.



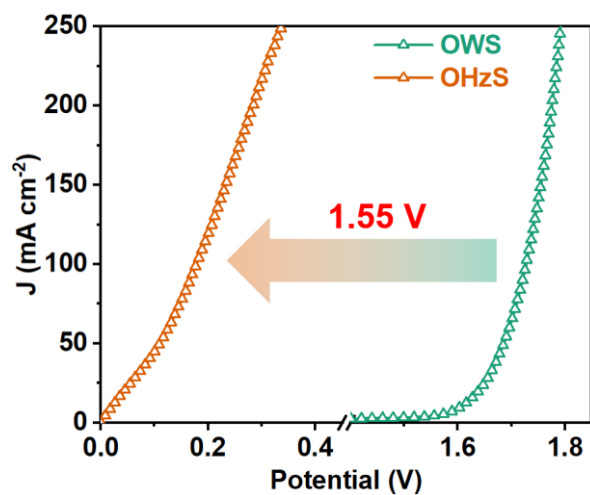

**Figure S20** LSV curves of W@Co<sub>2</sub>P/NF-based electrolyzer in 1 M KOH electrolyte with and without 0.4 M N<sub>2</sub>H<sub>4</sub>.

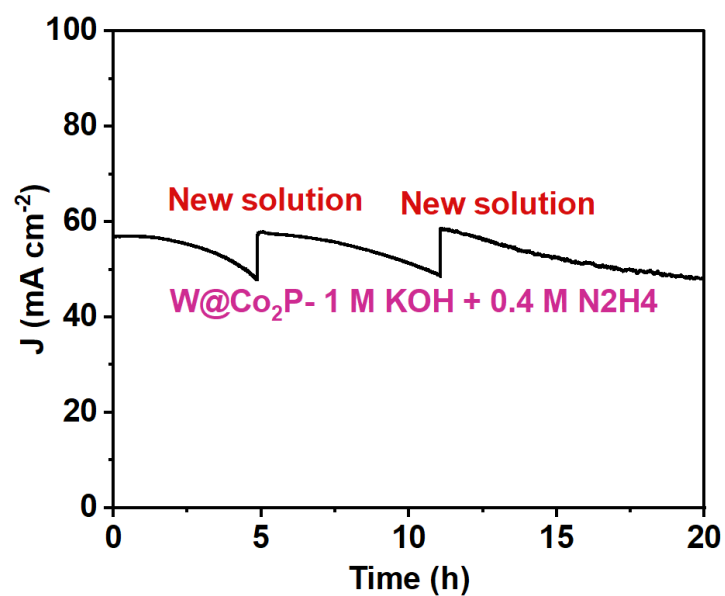

**Figure S21** Chronoamperometric response of W@Co<sub>2</sub>P/NF-based electrolyzer.

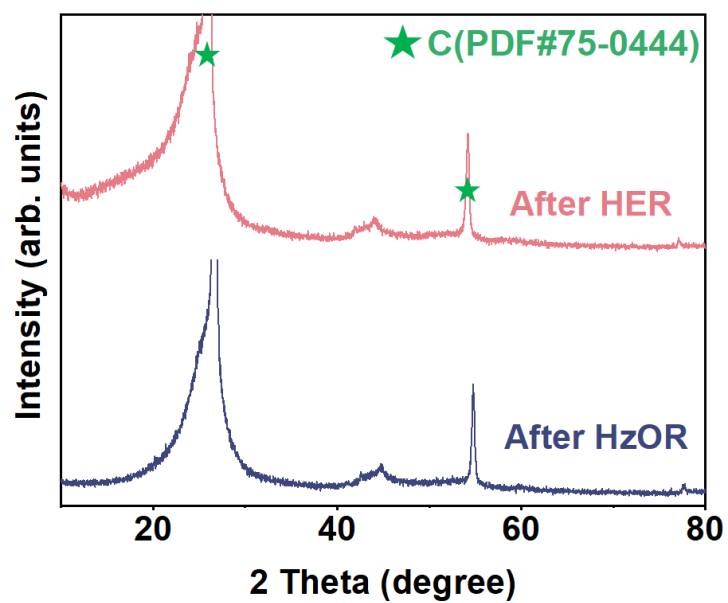

**Figure S22** The post-XRD patterns of W@Co<sub>2</sub>P/NF sample after a long time tests of HER and HzOR.

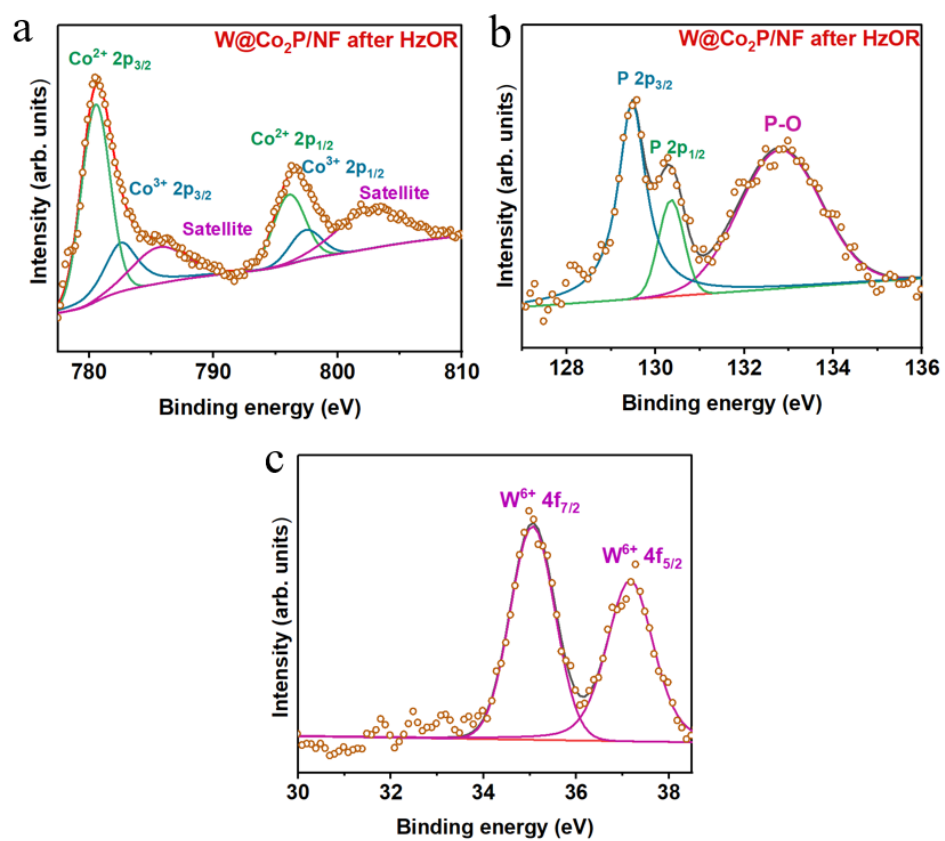

**Figure S23** The post-XPS spectra of W@Co<sub>2</sub>P/NF sample after a long time test of HzOR, (a) Co 2p, (b) P 2p and (c) W 4f.

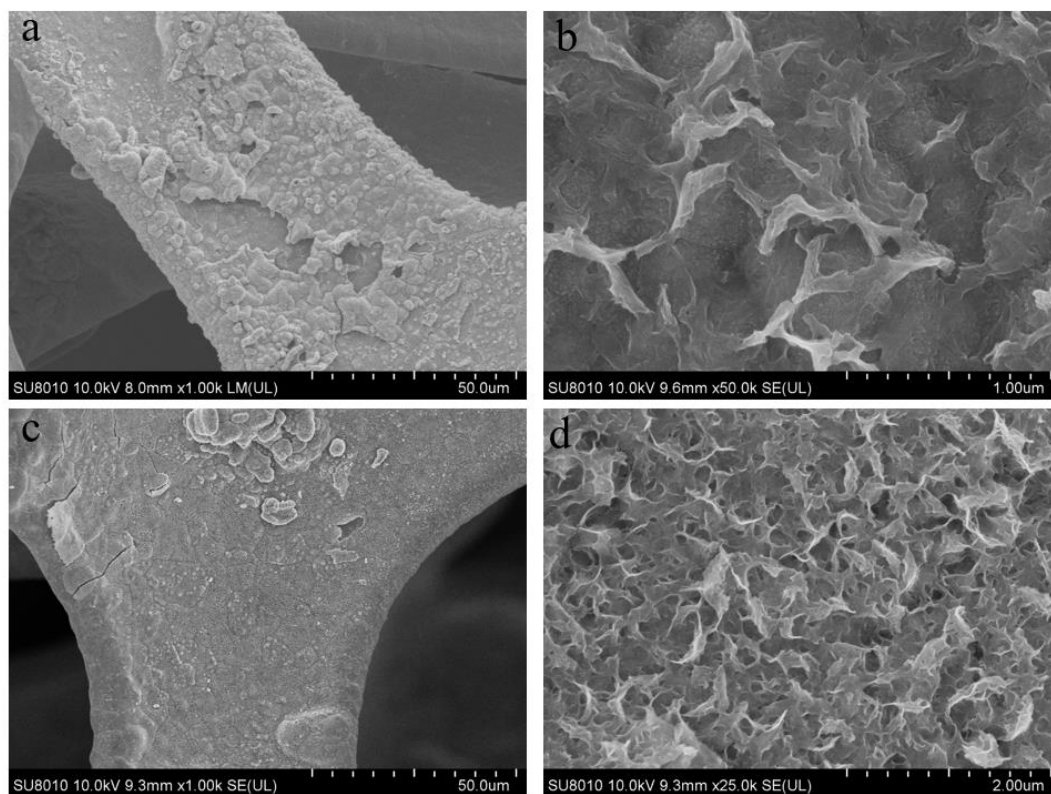

**Figure S24** The post-SEM images of W@Co<sub>2</sub>P/NF sample after a long time test of HzOR.

**Table S1** Performance comparison of W@Co<sub>2</sub>P/NF with various kinds of reported electrocatalysts for HER.

| Electrocatalyst                                          | $\eta_{100}$ (mV) | $\eta_{200}$ (mV) | Tafel slope (mV dec <sup>-1</sup> ) | Electrolyte | References |
|----------------------------------------------------------|-------------------|-------------------|-------------------------------------|-------------|------------|
| <b>W@Co<sub>2</sub>P/NF</b>                              | 100               | 118               | 39                                  | 1.0 M KOH   | This work  |
| <b>PW-Co<sub>3</sub>N NWA/NF</b>                         | 130               | 170               | 40                                  | 1.0 M KOH   | [1]        |
| <b>Cu<sub>1</sub>Ni<sub>2</sub>-N</b>                    | 200               | 250               | 71                                  | 1.0 M KOH   | [2]        |
| <b>Fe-CoSe<sub>2</sub></b>                               | 100               | 150               | 32                                  | 1.0 M KOH   | [3]        |
| <b>CoSe<sub>2</sub></b>                                  | 180               | 240               | 84                                  | 1.0 M KOH   | [4]        |
| <b>Ni(Cu)</b>                                            | 203               | 254               | /                                   | 1.0 M KOH   | [5]        |
| <b>Ni<sub>2</sub>P</b>                                   | 250               | 290               | /                                   | 1.0 M KOH   | [6]        |
| <b>CoSe/CP</b>                                           | 320               | 390               | 96                                  | 1.0 M KOH   | [7]        |
| <b>Ni<sub>0.5</sub>Co<sub>0.5</sub>Se<sub>2</sub>/CC</b> | 150               | 200               | 56.5                                | 1.0 M KOH   | [8]        |
| <b>NiCo-MoNi<sub>4</sub></b>                             | 170               | 210               | 67.5                                | 1.0 M KOH   | [9]        |
| <b>Ru-FeP<sub>4</sub>/IF</b>                             | 100               | 200               | 51                                  | 1.0 M KOH   | [11]       |
| <b>Ni<sub>2</sub>P-HNTs/NF</b>                           | 190               | 250               | 84                                  | 1.0 M KOH   | [12]       |
| <b>NiS<sub>2</sub>/TiM</b>                               | 250               | 350               | \                                   | 1.0 M KOH   | [13]       |
| <b>Mo-Ni<sub>3</sub>N/Ni/NF</b>                          | 170               | 220               | \                                   | 1.0 M KOH   | [14]       |
| <b>Ni<sub>2</sub>P/NF</b>                                | 200               | 290               | \                                   | 1.0 M KOH   | [15]       |
| <b>Ni(Cu)@NiFeP/NM</b>                                   | 105               | 160               | 57                                  | 1.0 M KOH   | [16]       |

**Table S2** Performance comparison of W@Co<sub>2</sub>P/NF with other well-developed catalytic materials for HzOR.

| Electrocatalyst                                          | $\eta_{50}$ (mV) | $\eta_{200}$ (mV) | Tafel slope<br>(mV dec <sup>-1</sup> ) | Electrolyte                                   | References |
|----------------------------------------------------------|------------------|-------------------|----------------------------------------|-----------------------------------------------|------------|
| <b>W@Co<sub>2</sub>P/NF</b>                              | 310              | 390               | 9.8                                    | 1.0 M KOH+0.4 M N <sub>2</sub> H <sub>4</sub> | This work  |
| <b>PW-Co<sub>3</sub>N NWA/NF</b>                         | 300              | 357               | 14                                     | 1.0 M KOH+0.4 M N <sub>2</sub> H <sub>4</sub> | [1]        |
| <b>Cu<sub>1</sub>Ni<sub>2</sub>-N</b>                    | 410              | 730               | 44                                     | 1.0 M KOH+0.4 M N <sub>2</sub> H <sub>4</sub> | [2]        |
| <b>Fe-CoSe<sub>2</sub></b>                               | 430              | 500               | 48                                     | 1.0 M KOH+0.4 M N <sub>2</sub> H <sub>4</sub> | [3]        |
| <b>CoSe<sub>2</sub></b>                                  | 390              | 680               | \                                      | 1.0 M KOH+0.4 M N <sub>2</sub> H <sub>4</sub> | [4]        |
| <b>Ni(Cu)</b>                                            | 400              | 500               | 51                                     | 1.0 M KOH+0.4 M N <sub>2</sub> H <sub>4</sub> | [5]        |
| <b>Ni<sub>2</sub>P</b>                                   | 315              | 335               | 55                                     | 1.0 M KOH+0.4 M N <sub>2</sub> H <sub>4</sub> | [6]        |
| <b>CoSe/CP</b>                                           | 490              | 520               | \                                      | 1.0 M KOH+0.4 M N <sub>2</sub> H <sub>4</sub> | [7]        |
| <b>Ni<sub>0.5</sub>Co<sub>0.5</sub>Se<sub>2</sub>/CC</b> | 350              | 520               | \                                      | 1.0 M KOH+0.4 M N <sub>2</sub> H <sub>4</sub> | [8]        |
| <b>NiCo-MoNi<sub>4</sub></b>                             | 345              | 430               | \                                      | 1.0 M KOH+0.4 M N <sub>2</sub> H <sub>4</sub> | [9]        |
| <b>FeWO<sub>4</sub>-WO<sub>3</sub>/NF</b>                | 350              | 400               | 36                                     | 1.0 M KOH+0.4 M N <sub>2</sub> H <sub>4</sub> | [10]       |
| <b>Ru-FeP<sub>4</sub>/IF</b>                             | 330              | 420               | \                                      | 1.0 M KOH+0.4 M N <sub>2</sub> H <sub>4</sub> | [11]       |
| <b>Ni<sub>2</sub>P-HNTs/NF</b>                           | 400              | 650               | \                                      | 1.0 M KOH+0.4 M N <sub>2</sub> H <sub>4</sub> | [12]       |
| <b>NiS<sub>2</sub>/TiM</b>                               | 400              | 490               | 22                                     | 1.0 M KOH+0.4 M N <sub>2</sub> H <sub>4</sub> | [13]       |
| <b>Mo-Ni<sub>3</sub>N/Ni/NF</b>                          | 360              | 400               | 48                                     | 1.0 M KOH+0.4 M N <sub>2</sub> H <sub>4</sub> | [14]       |
| <b>Ni<sub>2</sub>P/NF</b>                                | 260              | 350               | 55                                     | 1.0 M KOH+0.4 M N <sub>2</sub> H <sub>4</sub> | [15]       |

**Table S3** Performance comparison of W@Co<sub>2</sub>P/NF-based electrolyzers with other reported bifunctional electrodes.

| Electrodes                                | Cell voltage (V)<br>at 50 mA cm <sup>-2</sup> | Cell voltage (V)<br>at 200 mA cm <sup>-2</sup> | References |
|-------------------------------------------|-----------------------------------------------|------------------------------------------------|------------|
| <b>W@Co<sub>2</sub>P/NF</b>               | 0.1                                           | 0.3                                            | This work  |
| <b>PW-Co<sub>3</sub>N NWA/NF</b>          | 0.11                                          | 0.31                                           | [1]        |
| <b>Cu<sub>1</sub>Ni<sub>2</sub>-N</b>     | 0.85                                          | 1.2                                            | [2]        |
| <b>Fe-CoSe<sub>2</sub></b>                | 0.43                                          | 0.75                                           | [3]        |
| <b>CoSe<sub>2</sub></b>                   | 0.1                                           | 0.3                                            | [4]        |
| <b>Ni(Cu)</b>                             | 0.28                                          | 0.6                                            | [5]        |
| <b>Ni<sub>2</sub>P</b>                    | 0.4                                           | 0.6                                            | [6]        |
| <b>CoSe/CP</b>                            | 0.5                                           | 0.75                                           | [7]        |
| <b>NiCo-MoNi<sub>4</sub></b>              | 0.2                                           | 0.45                                           | [9]        |
| <b>FeWO<sub>4</sub>-WO<sub>3</sub>/NF</b> | 0.2                                           | 0.42                                           | [10]       |
| <b>Ru-FeP<sub>4</sub>/IF</b>              | 0.2                                           | 0.35                                           | [11]       |
| <b>Ni<sub>2</sub>P-HNTs/NF</b>            | 0.15                                          | 0.35                                           | [12]       |
| <b>NiS<sub>2</sub>/TiM</b>                | 0.55                                          | 0.95                                           | [13]       |
| <b>Mo-Ni<sub>3</sub>N/Ni/NF</b>           | 0.2                                           | 0.35                                           | [14]       |
| <b>Ni(Cu)@NiFeP/NM</b>                    | 0.35                                          | 0.75                                           | [15]       |
| <b>Ni<sub>3</sub>N-Co<sub>3</sub>N/NF</b> | 0.25                                          | 0.5                                            | [16]       |

## References

- [1] Y Liu , J Zhang , Y L, Q Qian, Z L, Y Zhu and G Zhang. *Nat. Commun*, 2020, **11(1)**: 1-13.
- [2] Z Wang, L Xu, F Huang, L Qu, J Li, K Owusu, Z Liu, Z Lin, B Xiang, X Liu, K Zhao, X Liao, W Yang, Y Cheng and L Mai. *Adv. Energy Mater*, 2019, **9(21)**: 1900390.
- [3] X Liu, J He, S Zhao, Y Liu, Z Zhao, J Luo, G Hu, X Sun and Y Ding. *Nat. Commun*, 2018, **9(1)**: 1-10.
- [4] J Zhang, H Wang, Y Tian, Y Yan, Q Xue, T He, H Liu, C Wang, Y Chen and B Xia. *Angew. Chem*, 2018, **130**: 7775-7779.
- [5] Q Sun , L Wang, Y Shen, M Zhou, Y Ma, Z Wang and C Zhao. *Acs sustain chem eng*, 2018, **6(10)**: 12746-12754.
- [6] C Tang, R Zhang, W Lu, Z Wang, D Liu, S Hao, G Du, A Asiri and X Sun. *Angew. Chem. Int. Ed*, 2017, **56(3)**: 842-846.
- [7] Z Pu, I Amiinu, F Gao, Z Xu, C Zhang, W Li, G Li and S Mu. *Journal of Power Sources*, 2018, **401**: 238-244.
- [8] G Wang, J Chen, P Cai, J Jia and Z Wen. *J. Mater. Chem. C*, 2018, **6(36)**: 17763-17770.
- [9] Z Wang, L Xu, F Huang, L Qu, J Li, K Owusu, Z Liu, Z Lin, B Xiang, X Liu, K Zhao, X Liao, W Yang, Y Cheng and L Mai. *Adv. Energy Mater*, 2019, **9(21)**: 1900390.
- [10] F Shen, Z Wang, Y Wang, G Qian, M Pan, L Luo, G Chen, H Wei and S Yin. *Nano Research*, 2021, **14(11)**: 4356-4361.
- [11] T Cui, J Chi, J Zhu, X Sun, J Lai, Z Li and L Wang. *Appl. Catal. B*, 2022, **319**: 121950.
- [12] T Wang, G Xu, H Sun, H Huang, F Li, P Chen and Y Chen. *Nanoscale*, 2020, **12(21)**: 11526-11535.
- [13] J Wang, X Ma, T Liu, D Liu, S Hao, G Du, R Kong, A Asiri and X Sun. *Mater. Today Phys*, 2017, **3**: 9-14.
- [14] Y Liu, J Zhang, Y Li, Q Qian, Z Li and G Zhang. *Adv funct mater*, 2021, **31(35)**: 2103673.
- [15] H Zhang, J Wang, F Qin, H Liu and C Wang. *Nano Res.*, 2021, **14(10)**: 3489-3496.
- [16] Q Qian, J Zhang, J Li, Y Li, X Jin, Y Zhu, Y Liu, Z Li, A Harairy, C Xiao, G Zhang and Y Xie. *Angew. Chem. Int. Ed*, **2021**, 133(11): 6049-6058.
